# Supplementary material
Source: publisher figshare collection journal article supplement (https://tandf.figshare.com/ndownloader/files/31554949)
Supplement: Supplementary file 1 [file 31554949]

**APPENDIX 2**

**Baseline characteristics of teachers, n (%)**

|  | Hearing loss  n=232 | | Good hearing  n=505 (100%) | *p* value  Chi square |
| --- | --- | --- | --- | --- |
|  | Poor  n=86 (100%) | Insufficient  n=146 (100%) |  |  |
| Age (years) |  |  |  | <0.01 |
| ≤45 | 7 (8) | 29 (20) | 182 (36) |  |
| 46-55 | 22 (26) | 44 (30) | 150 (30) |  |
| ≥56 | 57 (66) | 73 (50) | 173 (34) |  |
| Sex |  |  |  | <0.01 |
| Men | 42 (49) | 68 (47) | 171 (34) |  |
| Women | 44 (51) | 78 (53) | 334 (66) |  |
| Educational level |  |  |  | 0.08 |
| Low/medium | 12 (14) | 15 (10) | 36 (7) |  |
| High | 74 (86) | 131 (90) | 469 (93) |  |
| Type of task |  |  |  | 0.56 |
| Teaching only | 72 (84) | 129 (88) | 442 (88) |  |
| Mix of teaching and other tasks | 14 (16) | 17 (12) | 63 (12) |  |
| Physical education teacher |  |  |  | 0.42 |
| Yes | 6 (7) | 10 (7) | 50 (10) |  |
| No | 80 (93) | 136 (93) | 455 (90) |  |
| Current work hours |  |  |  | 0.35 |
| <30 | 22 (26) | 31 (21) | 130 (26) |  |
| 30-36 | 23 (27) | 48 (33) | 127 (25) |  |
| 37-40 | 25 (29) | 29 (20) | 118 (23) |  |
| >40 | 16 (19) | 38 (26) | 125 (25) |  |
| Self-rated health |  |  |  | <0.01 |
| Poor/fair | 14 (16) | 33 (23) | 44 (9) |  |
| Good | 47 (55) | 86 (59) | 251 (50) |  |
| Very good | 21 (24) | 19 (13) | 157 (31) |  |
| Excellent | 4 (5) | 8 (6) | 53 (10) |  |
| Capability set score |  |  |  |  |
| 0-3 | 37 (43) | 49 (34) | 108 (21) | <0.01 |
| 4-5 | 19 (22) | 48 (33) | 189 (37) | 0.02 |
| 6 | 14 (16) | 30 (21) | 117 (23) | 0.33 |
| 7 | 16 (19) | 19 (13) | 91 (18) | 0.34 |
